# Supplementary material
Source: Springer Nature journal article supplement (https://www.springermedizin.de/resource/supplementary/12891_2014_2247_MOESM4_ESM.pdf/9509784)

l/min

ml·kg<sup>-1</sup>·min<sup>-1</sup>

A: The Fox-Haskell formula (220-age)

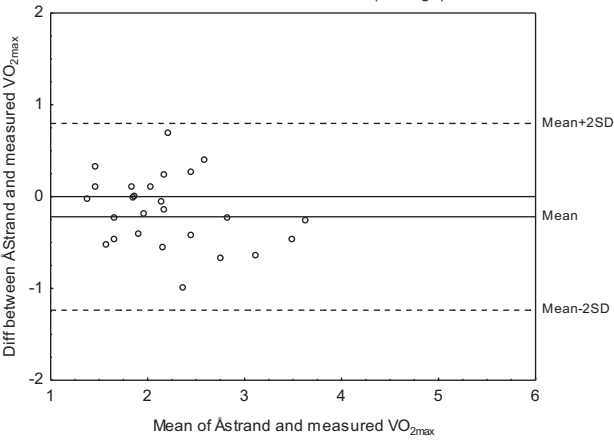

B: The Fox-Haskell formula (220-age)

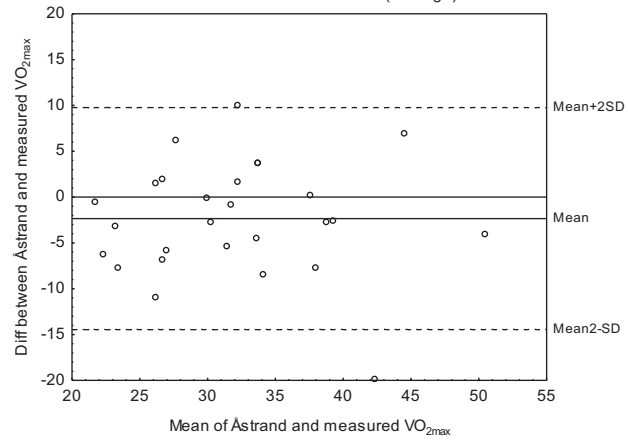

C: The Tanaka formula (208-0.7·age)

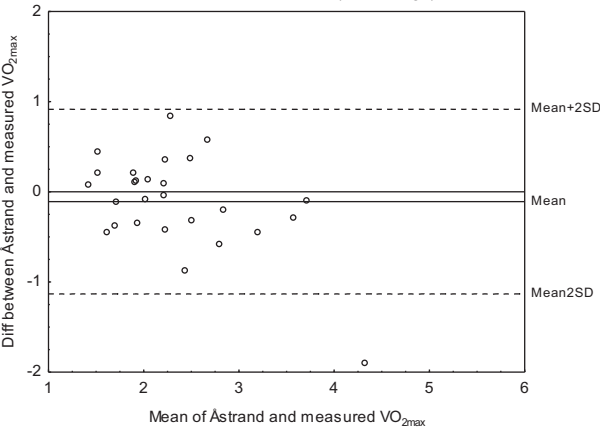

D: The Tanaka formula (208-0.7·age)

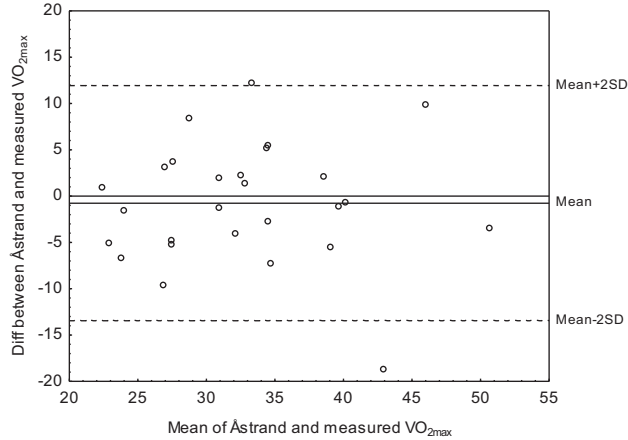

E: The Nes formula (211-0.64·age)

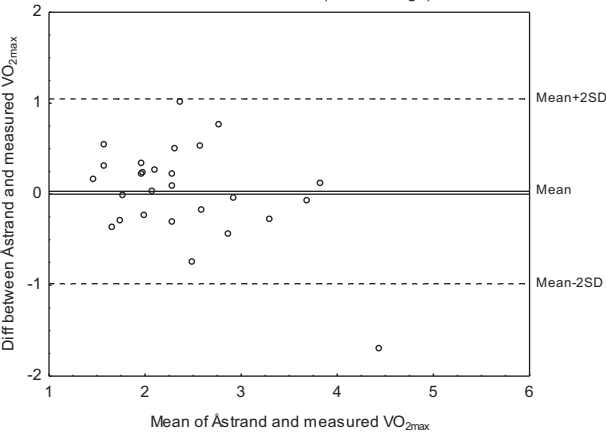

F: The Nes formula (211-0.64·age)

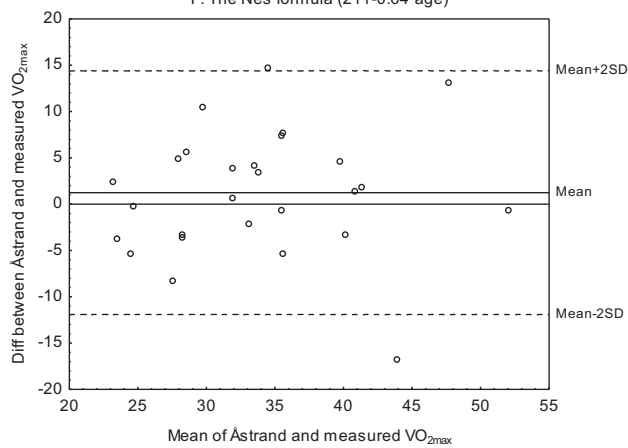

Supplement: MOESM4 [file 9509784]
